# Supplementary material
Source: publisher figshare collection journal article supplement (https://geolsoc.figshare.com/articles/dataset/_/3453998)
Supplement: Supplementary file 1 [file 1]

| <b>Sample</b> | <b>Low field bulk susceptibility at 77K</b> | <b>Low field bulk susceptibility at 294K</b> |
|---------------|---------------------------------------------|----------------------------------------------|
| PDA1-1        | 544.97                                      | 142.6                                        |
| PDA1-2B       | 559.83                                      | 152.6                                        |
| pda1-3A       | 580.87                                      | 165.4                                        |
| pda1-2A       | 481.63                                      | 153.1                                        |
| pda1-5A       | 430.33                                      | 145.1                                        |
| pda1-a        | 434.70                                      | 154.1                                        |
| pda2-3A       | 567.00                                      | 159.5                                        |
| pda2-5a       | 496.67                                      | 142.9                                        |
| pda2-4a       | 494.50                                      | 159.9                                        |
| pda2-6b       | 391.73                                      | 142                                          |
| pda2-1a       | 561.37                                      | 165.8                                        |
| pda2-1b       | 609.20                                      | 161.1                                        |
| pda6-7a       | 607.93                                      | 164.1                                        |
| pda6-4a       | 624.83                                      | 168.4                                        |
| pda6-4b       | 460.60                                      | 152.9                                        |
| pda6-3a       | 481.27                                      | 157.7                                        |
| pda6-1a       | 474.60                                      | 158                                          |
| pda6-1b       | 454.93                                      | 167.1                                        |
| pda7-1a       | 511.97                                      | 134.8                                        |
| pda7-2a       | 453.60                                      | 132.7                                        |
| pda7-3b       | 476.70                                      | 133                                          |
| pda7-3a       | 458.33                                      | 145.3                                        |
| pda7-5a       | 396.53                                      | 144.9                                        |
| pda7-5b       | 268.13                                      | 133.8                                        |
| pda22-2a      | 456.90                                      | 122.9                                        |
| pda22-4a      | 444.10                                      | 127.5                                        |
| pda22-5a      | 379.27                                      | 121.6                                        |
| pda22-3a      | 389.00                                      | 109.1                                        |
| pda22-6a      | 406.73                                      | 132.5                                        |
| pda22-1a      | 304.20                                      | 108.2                                        |
| pda27-5a      | 686.03                                      | 264.5                                        |
| pda27-3a      | 605.43                                      | 247.5                                        |
| pda27-3a      | 586.93                                      | 247.5                                        |
| pda27-6a      | 604.87                                      | 249.9                                        |
| pda27-1b      | 494.73                                      | 238.2                                        |
| pda27-3b      | 590.83                                      | 254.9                                        |
| pda27-4a      | 542.37                                      | 291.1                                        |
| kin3-07a      | 465.20                                      | 135.3                                        |
| kin3-09a      | 467.23                                      | 144.6                                        |
| kin3-02a      | 402.67                                      | 133.6                                        |
| kin3-08       | 363.00                                      | 141.6                                        |
| kin3-06a      | 251.90                                      | 136.7                                        |
| kin3-01a      | 198.27                                      | 132.2                                        |
| pda17-4a      | 390.40                                      | 0                                            |
| pda17-1c      | 434.10                                      | 176.2                                        |
| pda17-1b      | 471.97                                      | 183.6                                        |
| pda17-4a      | 273.50                                      | 162.7                                        |
| pda17-3b      | 294.63                                      | 176.2                                        |
| pda17-2a      | 459.33                                      | 169.9                                        |
| pda17-4b      | 303.70                                      | 155.7                                        |
| pda9-2a       | 160.50                                      | 101.8                                        |
| pda9-6b       | 100.43                                      | 101.2                                        |
| pda9-3a       | 52.13                                       | 107.1                                        |
| pda9-4b       | -131.43                                     | 99.33                                        |
| pda9-1a       | -117.13                                     | 97.72                                        |
| pda9-4a       | -125.30                                     | 120.7                                        |
