# Supplementary material
Source: publisher figshare collection journal article supplement (https://geolsoc.figshare.com/articles/dataset/_/3453998)
Supplement: Supplementary file 2 [file 1]

| Sample   | Sample Location |         |           | Bedding Orientation |         |               | Core Orientation |             | Matrix Elements |         |        |         |         |         |         |        |        |        |        |         |         |         |
|----------|-----------------|---------|-----------|---------------------|---------|---------------|------------------|-------------|-----------------|---------|--------|---------|---------|---------|---------|--------|--------|--------|--------|---------|---------|---------|
|          | GPS X           | GPS Y   | Elevation | Strike              | Dip     | Dip Direction | Core Azimuth     | Core Plunge | k11             | k22     | k33    | k12     | k23     | k13     |         |        |        |        |        |         |         |         |
| PdA1-1A  | 712500          | 4689051 | 3433      | 222                 | 55      | 312           | 288              | 72          | 0.9899          | 1.0079  | 1.0022 | -0.0014 | 0.0023  | 0.0073  |         |        |        |        |        |         |         |         |
| PdA1-2A  |                 |         |           |                     |         |               |                  |             | 0.9881          | 1.0096  | 1.0023 | 0.0016  | 0.0006  | 0.0073  |         |        |        |        |        |         |         |         |
| PdA1-2B  |                 |         |           |                     |         |               |                  |             | 0.9898          | 1.0085  | 1.0017 | -0.0004 | 0.0001  | 0.0055  |         |        |        |        |        |         |         |         |
| PdA1-2C  |                 |         |           |                     |         |               |                  |             | 0.9884          | 1.0079  | 1.0037 | -0.0007 | -0.0002 | 0.0056  |         |        |        |        |        |         |         |         |
| PdA1-3A  |                 |         |           |                     |         |               |                  |             | 0.9877          | 1.0073  | 1.005  | 0.0051  | -0.0003 | 0.0035  |         |        |        |        |        |         |         |         |
| PdA1-3B  |                 |         |           |                     |         |               |                  |             | 0.9878          | 1.007   | 1.0052 | 0.0086  | -0.0003 | 0.0037  |         |        |        |        |        |         |         |         |
| PdA1-4A  |                 |         |           |                     |         |               |                  |             | 0.9977          | 1.0052  | 0.9971 | 0.0034  | 0.0004  | -0.0049 |         |        |        |        |        |         |         |         |
| PdA1-4B  |                 |         |           |                     |         |               |                  |             | 0.9945          | 1.0051  | 1.0004 | 0.0033  | 0.0002  | -0.0061 |         |        |        |        |        |         |         |         |
| PdA1-5A  |                 |         |           |                     |         |               |                  |             | 0.9932          | 1.0068  | 1      | -0.0031 | -0.0001 | -0.0024 |         |        |        |        |        |         |         |         |
| PdA1-5B  |                 |         |           |                     |         |               |                  |             | 0.9907          | 1.0065  | 1.0027 | -0.0035 | -0.0006 | -0.0026 |         |        |        |        |        |         |         |         |
| PdA1-6A  |                 |         |           |                     |         |               |                  |             | 0.9911          | 1.0062  | 1.0026 | -0.0016 | -0.0005 | -0.0042 |         |        |        |        |        |         |         |         |
| PdA1-6B  |                 |         |           |                     |         |               |                  |             | 0.9908          | 1.0064  | 1.0028 | -0.0001 | 0.0009  | -0.0044 |         |        |        |        |        |         |         |         |
| PdA2-1A  | 712304          | 4688482 | 1075      | 197                 | 55      | 287           | 111              | 40          | 1.0064          | 1.0096  | 0.984  | 0.0021  | 0.0006  | -0.0042 |         |        |        |        |        |         |         |         |
| PdA2-1B  |                 |         |           |                     |         |               |                  |             | 1.0081          | 1.0094  | 0.9825 | 0.0013  | 0.0018  | -0.0053 |         |        |        |        |        |         |         |         |
| PdA2-2A  |                 |         |           |                     |         |               |                  |             | 1.0065          | 1.0102  | 0.9834 | 0.003   | 0.0068  | -0.0043 |         |        |        |        |        |         |         |         |
| PdA2-2B  |                 |         |           |                     |         |               |                  |             | 1.0054          | 1.0105  | 0.9841 | 0.0036  | 0.0031  | -0.0051 |         |        |        |        |        |         |         |         |
| PdA2-3A  |                 |         |           |                     |         |               |                  |             | 1.0104          | 1.0138  | 0.9758 | 0.0024  | 0.0056  | -0.0034 |         |        |        |        |        |         |         |         |
| PdA2-3B  |                 |         |           |                     |         |               |                  |             | 1.0053          | 1.0068  | 0.988  | 0.002   | 0.0042  | -0.0002 |         |        |        |        |        |         |         |         |
| PdA2-4A  |                 |         |           |                     |         |               |                  |             | 1.006           | 1.0116  | 0.9824 | 0.0015  | 0.0003  | -0.0046 |         |        |        |        |        |         |         |         |
| PdA2-4B  |                 |         |           |                     |         |               |                  |             | 1.0022          | 1.0087  | 0.9891 | 0.0026  | 0       | -0.0052 |         |        |        |        |        |         |         |         |
| PdA2-5A  |                 |         |           |                     |         |               |                  |             | 1.005           | 1.0092  | 0.9858 | 0.0014  | -0.0041 | -0.0015 |         |        |        |        |        |         |         |         |
| PdA2-5B  |                 |         |           |                     |         |               |                  |             | 1.0033          | 1.0103  | 0.9864 | 0.0019  | -0.0046 | -0.0015 |         |        |        |        |        |         |         |         |
| PdA2-5C  |                 |         |           |                     |         |               |                  |             | 1.0058          | 1.0149  | 0.9793 | 0.0019  | -0.003  | -0.0014 |         |        |        |        |        |         |         |         |
| PdA2-6A  |                 |         |           |                     |         |               |                  |             | 1.0052          | 1.0112  | 0.9836 | 0.0018  | -0.0016 | -0.0022 |         |        |        |        |        |         |         |         |
| PdA2-6B  |                 |         |           |                     |         |               |                  |             | 1.0038          | 1.0106  | 0.9856 | 0.0019  | -0.0016 | -0.0024 |         |        |        |        |        |         |         |         |
| PdA2-7A  |                 |         |           |                     |         |               |                  |             | 1.0061          | 1.0114  | 0.9824 | 0.0031  | -0.0009 | -0.0047 |         |        |        |        |        |         |         |         |
| PdA2-7B  | 1.0052          | 1.009   | 0.9859    | 0.0025              | 0.0018  | -0.004        |                  |             |                 |         |        |         |         |         |         |        |        |        |        |         |         |         |
| PdA3-1A  | 712103          | 4688028 | 1054      | 190                 | 55      | 280           | 89               | 38          | 1.0022          | 1.0098  | 0.988  | 0.0044  | -0.0015 | -0.0041 |         |        |        |        |        |         |         |         |
| PdA3-1B  |                 |         |           |                     |         |               |                  |             | 0.9994          | 1.0101  | 0.9905 | 0.0037  | -0.0046 | -0.0064 |         |        |        |        |        |         |         |         |
| PdA3-2A  |                 |         |           |                     |         |               |                  |             | 1.0032          | 1.0067  | 0.9901 | 0.0053  | -0.0012 | -0.0031 |         |        |        |        |        |         |         |         |
| PdA3-2B  |                 |         |           |                     |         |               |                  |             | 1.0045          | 1.0079  | 0.9876 | 0.0052  | -0.0016 | -0.0014 |         |        |        |        |        |         |         |         |
| PdA3-2C  |                 |         |           |                     |         |               |                  |             | 1.0068          | 1.0118  | 0.9814 | 0.0065  | 0.0007  | -0.0012 |         |        |        |        |        |         |         |         |
| PdA3-3A  |                 |         |           |                     |         |               |                  |             | 1.0023          | 1.0092  | 0.9886 | 0.0045  | -0.0011 | -0.0055 |         |        |        |        |        |         |         |         |
| PdA3-3B  |                 |         |           |                     |         |               |                  |             | 1.0018          | 1.0094  | 0.9888 | 0.0052  | 0       | -0.008  |         |        |        |        |        |         |         |         |
| PdA3-4A  |                 |         |           |                     |         |               |                  |             | 1.002           | 1.0073  | 0.993  | 0.0075  | 0       | -0.0039 |         |        |        |        |        |         |         |         |
| PdA3-4B  |                 |         |           |                     |         |               |                  |             | 1.0025          | 1.0079  | 0.9896 | 0.0057  | 0.0013  | -0.0055 |         |        |        |        |        |         |         |         |
| PdA3-4C  |                 |         |           |                     |         |               |                  |             | 1.0052          | 1.0085  | 0.9863 | 0.0053  | -0.0008 | -0.0062 |         |        |        |        |        |         |         |         |
| PdA3-5A  |                 |         |           |                     |         |               |                  |             | 1.0036          | 1.001   | 0.9954 | -0.0082 | -0.0088 | -0.0008 |         |        |        |        |        |         |         |         |
| PdA3-5B  |                 |         |           |                     |         |               |                  |             | 1.0047          | 1.0001  | 0.9953 | -0.0085 | -0.0086 | -0.0006 |         |        |        |        |        |         |         |         |
| PdA3-6A  |                 |         |           |                     |         |               |                  |             | 0.9945          | 1.01    | 0.9956 | 0.0034  | -0.002  | -0.0075 |         |        |        |        |        |         |         |         |
| PdA4-1A  |                 |         |           |                     |         |               |                  |             | 711616          | 4687968 | 1038   | 234     | 30      | 324     | 314     | 24     | 0.9963 | 1.0057 | 0.998  | 0.0011  | 0.0035  | -0.003  |
| PdA4-1B  | 0.9963          | 1.0061  | 0.9976    | 0                   | 0.0034  | -0.0025       |                  |             |                 |         |        |         |         |         |         |        |        |        |        |         |         |         |
| PdA4-1C  | 0.9937          | 1.0033  | 1.003     | 0.0009              | 0.0027  | -0.0014       |                  |             |                 |         |        |         |         |         |         |        |        |        |        |         |         |         |
| PdA4-2A  | 0.9917          | 1.0103  | 0.9992    | 0.0021              | 0.0035  | 0             |                  |             |                 |         |        |         |         |         |         |        |        |        |        |         |         |         |
| PdA4-2B  | 0.995           | 1.0015  | 1.0034    | 0.0024              | 0.0024  | -0.0005       |                  |             |                 |         |        |         |         |         |         |        |        |        |        |         |         |         |
| PdA4-3A  | 0.9939          | 1.0028  | 1.0033    | 0.0004              | 0.0036  | -0.0032       |                  |             |                 |         |        |         |         |         |         |        |        |        |        |         |         |         |
| PdA4-3B  | 0.9934          | 1.003   | 1.0037    | 0.0013              | 0.0042  | -0.004        |                  |             |                 |         |        |         |         |         |         |        |        |        |        |         |         |         |
| PdA4-4A  | 0.9936          | 1.0034  | 1.003     | -0.0008             | 0.0036  | -0.0063       |                  |             |                 |         |        |         |         |         |         |        |        |        |        |         |         |         |
| PdA4-4B  | 0.9938          | 1.0038  | 1.0024    | 0.0003              | 0.0033  | -0.0053       |                  |             |                 |         |        |         |         |         |         |        |        |        |        |         |         |         |
| PdA4-5A  | 0.992           | 1.0052  | 1.0028    | 0.0016              | 0.0057  | -0.0043       |                  |             |                 |         |        |         |         |         |         |        |        |        |        |         |         |         |
| PdA4-6A  | 0.9958          | 1.0035  | 1.0006    | 0.001               | 0.0034  | -0.0026       |                  |             |                 |         |        |         |         |         |         |        |        |        |        |         |         |         |
| PdA5-1A  | 710894          | 4688097 | 1085      | 270                 | 35      | 360           | 64               | 32          |                 |         |        |         |         |         |         |        | 0.9966 | 1.0055 | 0.9979 | 0.0035  | -0.0054 | 0.0001  |
| PdA5-2A  |                 |         |           |                     |         |               |                  |             |                 |         |        |         |         |         |         |        | 0.9947 | 1.0066 | 0.9988 | 0.0028  | -0.004  | 0.0003  |
| PdA5-2B  |                 |         |           |                     |         |               |                  |             |                 |         |        |         |         |         |         |        | 0.9939 | 1.0063 | 0.9998 | 0.0029  | -0.0046 | 0.0021  |
| PdA5-2C  |                 |         |           |                     |         |               |                  |             | 0.9936          | 1.0083  | 0.9981 | 0.0034  | -0.0037 | 0.0025  |         |        |        |        |        |         |         |         |
| PdA5-3A  |                 |         |           |                     |         |               |                  |             | 0.9977          | 1.0027  | 0.9996 | 0.0066  | -0.0041 | -0.0024 |         |        |        |        |        |         |         |         |
| PdA5-3B  |                 |         |           |                     |         |               |                  |             | 0.9958          | 1.0033  | 1.001  | 0.0061  | -0.0047 | -0.0028 |         |        |        |        |        |         |         |         |
| PdA5-4A  |                 |         |           |                     |         |               |                  |             | 0.9998          | 1.0032  | 0.997  | 0.0049  | -0.0041 | -0.0019 |         |        |        |        |        |         |         |         |
| PdA5-4B  |                 |         |           |                     |         |               |                  |             | 0.9986          | 1.0024  | 0.999  | 0.0042  | -0.003  | -0.0005 |         |        |        |        |        |         |         |         |
| PdA5-5A  |                 |         |           |                     |         |               |                  |             | 0.9983          | 1.0029  | 0.9988 | 0.0065  | -0.0033 | 0.0014  |         |        |        |        |        |         |         |         |
| PdA5-5B  |                 |         |           |                     |         |               |                  |             | 0.998           | 1.0045  | 0.9974 | 0.0042  | -0.0035 | 0.0013  |         |        |        |        |        |         |         |         |
| PdA5-6A  |                 |         |           |                     |         |               |                  |             | 0.9988          | 1.0042  | 0.997  | 0.0076  | -0.0036 | 0.0005  |         |        |        |        |        |         |         |         |
| PdA5-6B  |                 |         |           |                     |         |               |                  |             | 0.9971          | 1.0043  | 0.9986 | 0.0072  | -0.0038 | 0.0007  |         |        |        |        |        |         |         |         |
| PdA6-1A  |                 |         |           |                     |         |               |                  |             | 712032          | 4687005 | 1003   | 232     | 23      | 322     | 2       | 54     | 0.9924 | 1.0003 | 1.0073 | 0.0046  | -0.0063 | 0.0113  |
| PdA6-1B  |                 |         |           |                     |         |               |                  |             |                 |         |        |         |         |         |         |        | 1.0003 | 1.0091 | 0.9906 | -0.003  | -0.0062 | 0.0196  |
| PdA6-2A  | 0.9876          | 1       | 1.0123    | 0.0101              | -0.0022 | 0.0073        |                  |             |                 |         |        |         |         |         |         |        |        |        |        |         |         |         |
| PdA6-3A  | 0.9955          | 1.0087  | 0.9958    | 0.0015              | 0.0019  | 0.0093        |                  |             |                 |         |        |         |         |         |         |        |        |        |        |         |         |         |
| PdA6-3B  | 0.9908          | 1.0054  | 1.0038    | -0.0004             | -0.0002 | 0.0109        |                  |             |                 |         |        |         |         |         |         |        |        |        |        |         |         |         |
| PdA6-4A  | 0.9917          | 0.9973  | 1.011     | 0.0038              | -0.0068 | 0.0098        |                  |             |                 |         |        |         |         |         |         |        |        |        |        |         |         |         |
| PdA6-4B  | 0.9937          | 0.9967  | 1.0097    | 0.005               | -0.0048 | 0.0094        |                  |             |                 |         |        |         |         |         |         |        |        |        |        |         |         |         |
| PdA6-5A  | 0.9905          | 0.9989  | 1.0106    | 0.0022              | -0.0015 | 0.0131        |                  |             |                 |         |        |         |         |         |         |        |        |        |        |         |         |         |
| PdA6-5B  | 0.9933          | 1.0056  | 1.0011    | 0.0007              | -0.0037 | 0.0126        |                  |             |                 |         |        |         |         |         |         |        |        |        |        |         |         |         |
| PdA6-6A  | 0.9835          | 1.0115  | 1.005     | 0.0056              | -0.0011 | 0.0152        |                  |             |                 |         |        |         |         |         |         |        |        |        |        |         |         |         |
| PdA6-7A  | 0.9747          | 1.0084  | 1.0169    | 0.0151              | 0.0005  | 0.0161        |                  |             |                 |         |        |         |         |         |         |        |        |        |        |         |         |         |
| PdA7-1A  | 710340          | 4688055 | 1125      | 242                 | 23      | 332           | 344              | 22          |                 |         |        |         |         |         |         |        | 0.994  | 1.002  | 1.0039 | -0.0035 | -0.0021 | -0.0025 |
| PdA7-1B  |                 |         |           |                     |         |               |                  |             |                 |         |        |         |         |         |         |        | 0.9919 | 1.0031 | 1.005  | -0.0016 | -0.0019 | -0.004  |
| PdA7-2A  |                 |         |           |                     |         |               |                  |             |                 |         |        |         |         |         |         |        | 0.9954 | 1.0018 | 1.0028 | 0.0011  | 0.0001  | -0.0014 |
| PdA7-2B  |                 |         |           |                     |         |               |                  |             | 0.9983          | 0.9968  | 1.0049 | -0.0006 | -0.0001 | -0.001  |         |        |        |        |        |         |         |         |
| PdA7-3A  |                 |         |           |                     |         |               |                  |             | 0.9994          | 1.0019  | 0.9987 | 0.0025  | -0.0004 | 0.0026  |         |        |        |        |        |         |         |         |
| PdA7-3B  |                 |         |           |                     |         |               |                  |             | 0.9916          | 1.0035  | 1.0049 | -0.0006 | 0.002   | 0.0029  |         |        |        |        |        |         |         |         |
| PdA7-4A  |                 |         |           |                     |         |               |                  |             | 0.9914          | 1.0004  | 1.0082 | -0.0001 | 0.0029  | 0.0014  |         |        |        |        |        |         |         |         |
| PdA7-4B  |                 |         |           |                     |         |               |                  |             | 0.9947          | 1.0042  | 1.0011 | 0.0029  | 0.0042  | 0.0017  |         |        |        |        |        |         |         |         |
| PdA7-5A  |                 |         |           |                     |         |               |                  |             | 1.0036          | 1.0075  | 0.9888 | 0.0015  | 0.0009  | 0.0023  |         |        |        |        |        |         |         |         |
| PdA7-5B  |                 |         |           |                     |         |               |                  |             | 0.9963          | 1.0013  | 1.0024 | 0.0009  | 0.0023  | 0.0041  |         |        |        |        |        |         |         |         |
| PdA7-6A  |                 |         |           |                     |         |               |                  |             | 0.996           | 0.9993  | 1.0047 | -0.0009 | 0.0013  | 0.0045  |         |        |        |        |        |         |         |         |
| PdA7-6B  |                 |         |           |                     |         |               |                  |             | 0.9981          | 1.0009  | 1.001  | -0.0016 | 0.002   | 0.0031  |         |        |        |        |        |         |         |         |
| PdA8-1A  |                 |         |           |                     |         |               |                  |             | 711377          | 4686777 | 974    | 274     | 27      | 4       | 173     | 61     | 1.0177 | 1.0058 | 0.9765 | 0.0008  | -0.0031 | 0.001   |
| PdA8-2A  |                 |         |           |                     |         |               |                  |             |                 |         |        |         |         |         |         |        | 1.0174 | 1.0098 | 0.9728 | 0.0021  | -0.0049 | 0.0021  |
| PdA8-3A  | 1.0169          | 1.0083  | 0.9748    | -0.0036             | 0.0012  | 0.0027        |                  |             |                 |         |        |         |         |         |         |        |        |        |        |         |         |         |
| PdA8-4A  | 0.9843          | 0.9996  | 1.0162    | -0.0161             | 0.0082  | 0.0084        |                  |             |                 |         |        |         |         |         |         |        |        |        |        |         |         |         |
| PdA8-5A  | 0.9749          | 1.0055  | 1.0196    | -0.0134             | 0.0045  | 0.0049        |                  |             |                 |         |        |         |         |         |         |        |        |        |        |         |         |         |
| PdA8-5B  | 0.9752          | 1.0069  | 1.0179    | -0.0077             | 0.0056  | 0.0041        |                  |             |                 |         |        |         |         |         |         |        |        |        |        |         |         |         |
| PdA8-6A  | 0.9861          | 1.0001  | 1.0138    | -0.0137             | 0.0078  | 0.0041        |                  |             |                 |         |        |         |         |         |         |        |        |        |        |         |         |         |
| PdA8-6B  | 0.9829          | 1.0004  | 1.0166    | -0.0123             | 0.0055  | -0.0001       |                  |             |                 |         |        |         |         |         |         |        |        |        |        |         |         |         |
| PdA9-1A  | 710628          | 4687474 | 997       | 255                 | 23      | 345           | 14               | 48          |                 |         |        |         |         |         |         |        | 0.9962 | 1.0015 | 1.0024 | -0.0001 | -0.0037 | 0.0045  |
| PdA9-1B  |                 |         |           |                     |         |               |                  |             |                 |         |        |         |         |         |         |        | 0.9959 | 1.0005 | 1.0036 | -0.0004 | -0.0054 | 0.0031  |
| PdA9-2A  |                 |         |           |                     |         |               |                  |             |                 |         |        |         |         |         |         |        | 0.9983 | 1.0039 | 0.9978 | -0.0006 | -0.0042 | 0.0037  |
| PdA9-3A  |                 |         |           |                     |         |               |                  |             |                 |         |        |         |         |         |         |        | 0.9977 | 0.9998 | 1.0025 | -0.0025 | -0.0004 | 0.0039  |
| PdA9-3B  |                 |         |           |                     |         |               |                  |             |                 |         |        |         |         |         |         |        | 0.9965 | 1.0015 | 1.0019 | -0.0017 | -0.0023 | 0.0042  |
| PdA9-4A  |                 |         |           |                     |         |               |                  |             |                 |         |        |         |         |         |         |        | 0.9974 | 1.0021 | 1.0005 | 0.0002  | -0.005  | -0.0036 |
| PdA9-4B  |                 |         |           |                     |         |               |                  |             | 0.9964          | 1.0021  | 1.0015 | 0.0011  | -0.0025 | 0.0038  |         |        |        |        |        |         |         |         |
| PdA9-5A  |                 |         |           |                     |         |               |                  |             | 4               | 51      | 1.0022 | 1.0046  | 0.9932  | -0.001  | -0.0005 | 0.0054 |        |        |        |         |         |         |
| PdA9-6A  |                 |         |           |                     |         |               |                  |             | 0.9961          | 1.0012  | 1.0027 | -0.0021 | -0.0023 | 0.0057  |         |        |        |        |        |         |         |         |
| PdA9-6B  |                 |         |           |                     |         |               |                  |             | 0.9957          | 1.0027  | 1.0016 | -0.0016 | -0.0024 | 0.0045  |         |        |        |        |        |         |         |         |
| PdA10-1A |                 |         |           |                     |         |               |                  |             | 710587          | 4687662 | 928    | 265     | 25      | 355     | 330     | 37     | 0.9984 | 0.9997 | 1.0018 | -0.0003 | 0.0026  | 0.0031  |
| PdA10-1B |                 |         |           |                     |         |               |                  |             |                 |         |        |         |         |         |         |        | 0.9994 | 0.9979 | 1.0027 | -0.0012 | 0.0037  | 0.0037  |
| PdA10-2A |                 |         |           |                     |         |               |                  |             |                 |         |        |         |         |         |         |        | 0.9948 | 1.0007 | 1.0045 | 0.0021  | 0.0037  | 0.0001  |
| PdA10-2B |                 |         |           |                     |         |               |                  |             |                 |         |        |         |         |         |         |        | 0.9969 | 1.0032 | 0.9998 | 0.0021  | 0.0028  | 0.001   |
| PdA10-3A | 0.9974          | 0.9989  | 1.0038    | -0.0004             | 0.0029  | 0.0015        |                  |             |                 |         |        |         |         |         |         |        |        |        |        |         |         |         |
| PdA10-3B | 0.999           | 0.998   | 1.003     | 0.0001              | 0.0037  | -0.0006       |                  |             |                 |         |        |         |         |         |         |        |        |        |        |         |         |         |
| PdA10-4A | 0.9969          | 1.0015  | 1.0016    | -0.0017             | 0.0012  | 0.0022        |                  |             |                 |         |        |         |         |         |         |        |        |        |        |         |         |         |
| PdA10-4B | 0.9978          | 0.9996  | 1.0026    | -0.0013             | 0.0015  | 0.0012        |                  |             |                 |         |        |         |         |         |         |        |        |        |        |         |         |         |
| PdA10-5A | 0.9992          | 0.9982  | 1.0026    | -0.0008             | 0.0018  | 0.0029        |                  |             |                 |         |        |         |         |         |         |        |        |        |        |         |         |         |
| PdA10-5B | 0.9981          | 0.9989  | 1.003     | 0                   | 0.0033  | 0.003         |                  |             |                 |         |        |         |         |         |         |        |        |        |        |         |         |         |
| PdA10-6A | 1.0003          | 0.9983  | 1.0014    | 0.0004              | 0.0045  | 0.0053        |                  |             |                 |         |        |         |         |         |         |        |        |        |        |         |         |         |
| PdA10-6B | 0.9992          | 0.9989  | 1.0018    | 0.0019              | 0.0037  | 0.0045        |                  |             |                 |         |        |         |         |         |         |        |        |        |        |         |         |         |
| PdA11-1A | 710927          | 4687725 | 942       | 200                 | 43      | 290           | 321              | 50          |                 |         |        |         |         |         |         |        | 0.997  | 1.0001 | 1.0029 | 0.0008  | 0.0021  | 0.0038  |
| PdA11-1B |                 |         |           |                     |         |               |                  |             |                 |         |        |         |         |         |         |        | 0.9962 | 1.0011 | 1.0027 | 0.0026  | 0.0023  | 0.0044  |

|          |        |         |      |     |    |     |     |    |        |        |        |         |         |         |
|----------|--------|---------|------|-----|----|-----|-----|----|--------|--------|--------|---------|---------|---------|
| PdA11-2A |        |         |      |     |    |     | 327 | 49 | 0.9971 | 0.9995 | 1.0033 | 0.0014  | 0.0022  | 0.0029  |
| PdA11-3A |        |         |      |     |    |     | 284 | 47 | 0.9972 | 1.003  | 0.9998 | -0.0019 | 0.0039  | 0.0017  |
| PdA11-4A |        |         |      |     |    |     | 289 | 52 | 0.9958 | 1.0015 | 1.0027 | -0.0033 | 0.006   | 0.0006  |
| PdA11-4B |        |         |      |     |    |     | 289 | 52 | 0.995  | 1.0019 | 1.0031 | -0.002  | 0.0049  | -0.0004 |
| PdA11-5A |        |         |      |     |    |     | 231 | 54 | 0.9993 | 1.0039 | 0.9967 | -0.0011 | 0.0028  | 0.0014  |
| PdA11-5B |        |         |      |     |    |     | 231 | 54 | 0.9988 | 1.0035 | 0.9977 | -0.0011 | 0.0046  | 0.0025  |
| PdA11-6A |        |         |      |     |    |     | 312 | 51 | 0.9995 | 1.002  | 0.9985 | -0.0002 | 0.0032  | 0.0018  |
| PdA11-6B |        |         |      |     |    |     | 312 | 51 | 0.998  | 1.0024 | 0.9996 | 0.0007  | 0.0046  | 0.0013  |
| PdA12-1A | 712450 | 4688956 | 1026 | 212 | 52 | 302 | 9   | 59 | 1.0059 | 0.9917 | 1.0024 | 0.0023  | -0.0093 | 0.0023  |
| PdA12-1B |        |         |      |     |    |     | 19  | 59 | 1.0064 | 0.9898 | 1.0038 | 0.0019  | -0.0105 | 0.0022  |
| PdA12-2A |        |         |      |     |    |     | 14  | 61 | 1.0055 | 0.9939 | 1.0006 | 0.003   | -0.0095 | 0.0033  |
| PdA12-2B |        |         |      |     |    |     | 14  | 61 | 1.0054 | 0.9933 | 1.0013 | 0.0043  | -0.0115 | 0.0048  |
| PdA12-3A |        |         |      |     |    |     | 354 | 63 | 1.0027 | 0.9954 | 1.0019 | 0.0069  | -0.0084 | 0.0063  |
| PdA12-4A |        |         |      |     |    |     | 353 | 55 | 0.9999 | 0.9945 | 1.0056 | 0.0099  | -0.0069 | 0.0033  |
| PdA12-4B |        |         |      |     |    |     | 353 | 55 | 1.0028 | 0.9936 | 1.0036 | 0.0057  | -0.0065 | 0.0022  |
| PdA12-5A |        |         |      |     |    |     | 347 | 61 | 0.9908 | 1.001  | 1.0083 | 0.0107  | -0.0037 | 0.0088  |
| PdA12-6A |        |         |      |     |    |     | 335 | 57 | 0.9964 | 0.9986 | 1.005  | 0.0094  | -0.0031 | 0.0065  |
| PdA12-6B |        |         |      |     |    |     | 335 | 57 | 0.9931 | 0.9993 | 1.0076 | 0.0091  | -0.0036 | 0.0053  |
| PdA12-7A |        |         |      |     |    |     | 336 | 59 | 0.9948 | 0.9988 | 1.0064 | 0.0094  | -0.0011 | 0.0059  |
| PdA12-7B |        |         |      |     |    |     | 336 | 59 | 0.9912 | 1.0027 | 1.006  | 0.0074  | -0.0014 | 0.0057  |
| PdA13-1A | 712242 | 4688441 | 986  | 200 | 43 | 290 | 302 | 18 | 0.9993 | 1.006  | 0.9948 | 0       | -0.0023 | -0.0041 |
| PdA13-2A |        |         |      |     |    |     | 299 | 21 | 1.0124 | 1.011  | 0.9766 | 0.0015  | -0.0026 | -0.0049 |
| PdA13-2B |        |         |      |     |    |     | 299 | 21 | 0.9998 | 1.0092 | 0.991  | 0.0035  | -0.0021 | -0.0052 |
| PdA13-3A |        |         |      |     |    |     | 299 | 27 | 0.9987 | 1.0052 | 0.9961 | -0.0004 | -0.0026 | -0.0034 |
| PdA13-3B |        |         |      |     |    |     | 299 | 27 | 0.999  | 1.0066 | 0.9943 | 0.0015  | -0.001  | -0.0045 |
| PdA13-4A |        |         |      |     |    |     | 283 | 14 | 1.0024 | 1.0084 | 0.9892 | 0.0031  | 0.0014  | -0.0049 |
| PdA13-4B |        |         |      |     |    |     | 283 | 14 | 1.0002 | 1.0028 | 0.997  | 0.0037  | -0.0003 | 0.0052  |
| PdA13-4C |        |         |      |     |    |     | 283 | 14 | 0.9995 | 1.0057 | 0.9948 | 0.0023  | -0.0004 | -0.0056 |
| PdA13-5A |        |         |      |     |    |     | 289 | 29 | 1.0001 | 1.0024 | 0.9975 | -0.0023 | -0.005  | -0.0029 |
| PdA13-6A |        |         |      |     |    |     | 296 | 26 | 1.0057 | 1.0027 | 0.9916 | -0.0022 | -0.0049 | -0.0006 |
| PdA13-6B |        |         |      |     |    |     | 296 | 26 | 1.0079 | 0.9999 | 0.9922 | -0.003  | -0.0051 | -0.0022 |
| PdA14-1A | 711824 | 4688928 | 1097 | 220 | 33 | 310 | 343 | 19 | 0.9892 | 1.0028 | 1.008  | 0.0055  | 0.0004  | -0.0025 |
| PdA14-2A |        |         |      |     |    |     | 332 | 22 | 0.99   | 1.0005 | 1.0095 | 0.0007  | 0.002   | -0.0012 |
| PdA14-2B |        |         |      |     |    |     | 332 | 22 | 0.9927 | 1.0073 | 1.0073 | 0.003   | 0.0022  | 0.0063  |
| PdA14-3A |        |         |      |     |    |     | 334 | 24 | 0.9997 | 0.9958 | 1.0045 | 0.0071  | 0.0044  | -0.0034 |
| PdA14-3B |        |         |      |     |    |     | 334 | 24 | 0.9986 | 0.9953 | 1.0061 | 0.0068  | 0.005   | -0.004  |
| PdA14-3C |        |         |      |     |    |     | 334 | 24 | 0.9995 | 0.9956 | 1.0049 | 0.0065  | 0.0031  | -0.0002 |
| PdA14-4A |        |         |      |     |    |     | 335 | 26 | 0.9928 | 1.0004 | 1.0068 | 0.0045  | 0.0031  | -0.0024 |
| PdA14-4B |        |         |      |     |    |     | 335 | 26 |        |        |        |         |         |         |
| PdA14-5A |        |         |      |     |    |     | 331 | 36 | 0.9926 | 0.999  | 1.0084 | 0.01    | 0.0039  | -0.0039 |
| PdA14-5B |        |         |      |     |    |     | 331 | 36 | 0.9925 | 0.9977 | 1.0099 | 0.0107  | 0.0033  | -0.0017 |
| PdA14-6A |        |         |      |     |    |     | 324 | 19 | 0.9963 | 0.9996 | 1.0041 | 0.0059  | 0.0053  | -0.005  |
| PdA14-6B |        |         |      |     |    |     | 324 | 19 |        |        |        |         |         |         |
| PdA15-1A | 713596 | 4689488 | 1188 | 270 | 30 | 0   | 302 | 18 | 0.9866 | 1.0041 | 1.0093 | -0.0034 | -0.0007 | 0.0025  |
| PdA15-1B |        |         |      |     |    |     | 302 | 18 | 0.9912 | 1.0006 | 1.0082 | -0.0089 | 0.0013  | 0.0039  |
| PdA15-2A |        |         |      |     |    |     | 299 | 27 | 0.9846 | 1.0052 | 1.0102 | -0.0075 | 0.0016  | 0.0042  |
| PdA15-3A |        |         |      |     |    |     | 299 | 27 |        |        |        |         |         |         |
| PdA15-4A |        |         |      |     |    |     | 283 | 14 | 0.9929 | 0.9993 | 1.0078 | -0.009  | 0.0009  | 0.0017  |
| PdA15-4B |        |         |      |     |    |     | 283 | 14 | 0.9909 | 0.9982 | 1.0109 | -0.0099 | 0.0015  | 0.002   |
| PdA15-5A |        |         |      |     |    |     | 289 | 29 | 0.9914 | 1.0017 | 1.0069 | -0.0093 | 0.0039  | 0.0052  |
| PdA15-6A |        |         |      |     |    |     | 296 | 26 | 0.9961 | 0.9978 | 1.0061 | -0.0096 | 0.0031  | 0.0037  |
| PdA15-6B |        |         |      |     |    |     | 296 | 26 | 0.996  | 0.9989 | 1.0052 | -0.0089 | 0.0027  | 0.0028  |
| PdA16-1A | 714043 | 4689409 | 1226 | 295 | 50 | 25  | 15  | 47 | 0.9914 | 1.0084 | 1.0003 | -0.0014 | -0.001  | 0.0027  |
| PdA16-1B |        |         |      |     |    |     | 15  | 47 | 0.9899 | 1.0066 | 1.0035 | -0.0028 | 0.0009  | 0.0042  |
| PdA16-2A |        |         |      |     |    |     | 16  | 38 | 0.9871 | 1.0085 | 1.0044 | 0.0044  | -0.0007 | 0.0013  |
| PdA16-2B |        |         |      |     |    |     | 16  | 38 | 0.9869 | 1.008  | 1.005  | 0.0037  | -0.0007 | 0.0013  |
| PdA16-3A |        |         |      |     |    |     | 10  | 34 | 0.9867 | 1.0085 | 1.0048 | -0.0019 | -0.0001 | 0.0003  |
| PdA16-3B |        |         |      |     |    |     | 10  | 34 | 0.9867 | 1.0077 | 1.0056 | -0.0021 | 0.0004  | -0.0004 |
| PdA16-3C |        |         |      |     |    |     | 10  | 34 | 0.9874 | 1.008  | 1.0046 | 0.0017  | 0.0002  | 0.0013  |
| PdA16-4A |        |         |      |     |    |     | 20  | 44 | 0.989  | 1.0073 | 1.0037 | 0.0019  | -0.0003 | 0.0032  |
| PdA16-4B |        |         |      |     |    |     | 20  | 44 | 0.9853 | 1.0086 | 1.0061 | -0.0023 | -0.0004 | 0.0036  |
| PdA16-4C |        |         |      |     |    |     | 20  | 44 | 0.9901 | 1.0062 | 1.0037 | 0.0037  | 0.0076  | 0       |
| PdA16-5A |        |         |      |     |    |     | 28  | 35 | 0.9863 | 1.008  | 1.0057 | -0.0009 | -0.0006 | 0.0009  |
| PdA16-5B |        |         |      |     |    |     | 28  | 35 | 0.9865 | 1.0072 | 1.0062 | -0.0009 | -0.0014 | 0.0018  |
| PdA16-6A |        |         |      |     |    |     | 20  | 38 | 0.99   | 1.0028 | 1.0072 | -0.009  | 0.0005  | 0.0031  |
| PdA17-1A | 715084 | 4688885 | 1146 | 295 | 36 | 25  | 36  | 52 | 0.9933 | 1.0023 | 1.0043 | -0.0021 | -0.0028 | 0.0023  |
| PdA17-1B |        |         |      |     |    |     | 36  | 52 | 0.9938 | 1.0067 | 0.9995 | 0.0023  | -0.0031 | -0.0025 |
| PdA17-1C |        |         |      |     |    |     | 36  | 52 | 0.9934 | 1.0044 | 1.0022 | 0.0011  | -0.0041 | 0.0001  |
| PdA17-2A |        |         |      |     |    |     | 34  | 54 | 0.9878 | 1.0069 | 1.0052 | 0.0006  | -0.0036 | 0.0009  |
| PdA17-3A |        |         |      |     |    |     | 12  | 33 | 0.9893 | 1.0067 | 1.004  | -0.0011 | -0.0039 | -0.0067 |
| PdA17-3B |        |         |      |     |    |     | 12  | 33 | 0.9883 | 1.0019 | 1.0097 | -0.0008 | -0.0058 | 0.0006  |
| PdA17-4A |        |         |      |     |    |     | 30  | 26 | 0.9914 | 1.0044 | 1.0042 | 0.0008  | -0.0034 | -0.0033 |
| PdA17-4B |        |         |      |     |    |     | 30  | 26 | 0.991  | 1.0033 | 1.0057 | 0.002   | -0.0029 | -0.0058 |
| PdA17-6A |        |         |      |     |    |     | 34  | 28 | 0.9962 | 1.0056 | 0.9982 | 0.0011  | -0.0032 | -0.0022 |
| PdA18-1A | 715759 | 4688336 | 1012 | 284 | 43 | 14  | 56  | 36 | 0.9949 | 1.0055 | 0.9996 | 0.0038  | -0.0052 | -0.0003 |
| PdA18-1B |        |         |      |     |    |     | 56  | 36 | 0.9933 | 1.0042 | 1.0024 | 0.0046  | -0.0044 | 0.0011  |
| PdA18-2A |        |         |      |     |    |     | 55  | 42 | 0.9927 | 1.0052 | 1.0021 | 0.0028  | -0.0044 | 0.0003  |
| PdA18-2B |        |         |      |     |    |     | 49  | 41 | 0.9928 | 1.0042 | 1.0029 | 0.0043  | -0.0053 | 0.0007  |
| PdA18-3A |        |         |      |     |    |     | 49  | 41 | 0.9946 | 1.0034 | 1.002  | 0.0025  | -0.0048 | 0.0003  |
| PdA18-3B |        |         |      |     |    |     | 49  | 41 | 0.9938 | 1.0063 | 0.9999 | 0.001   | -0.0045 | 0.0005  |
| PdA18-3C |        |         |      |     |    |     | 49  | 41 | 0.9942 | 1.0052 | 1.0006 | 0.0011  | -0.0051 | 0.0018  |
| PdA18-4A |        |         |      |     |    |     | 52  | 43 | 0.9949 | 1.0044 | 1.0007 | 0.004   | -0.0054 | 0.0004  |
| PdA18-4B |        |         |      |     |    |     | 52  | 43 | 0.9953 | 1.0017 | 1.003  | 0.005   | -0.0051 | 0.0008  |
| PdA18-5A |        |         |      |     |    |     | 46  | 34 | 0.9971 | 1.0035 | 0.9994 | 0.0001  | -0.0052 | -0.0013 |
| PdA18-5B |        |         |      |     |    |     | 46  | 34 | 0.9963 | 1.0006 | 1.0037 | 0.001   | -0.0057 | -0.0022 |
| PdA18-6A |        |         |      |     |    |     | 41  | 29 | 0.9973 | 1.0051 | 0.9976 | 0.003   | -0.0042 | -0.0011 |
| PdA18-6B |        |         |      |     |    |     | 41  | 29 | 0.9958 | 1.0013 | 1.003  | 0.0027  | -0.0042 | -0.0007 |
| PdA19-1A | 715548 | 4688213 | 990  | 256 | 27 | 346 | 3   | 14 | 0.9945 | 0.998  | 1.0075 | -0.0008 | -0.0027 | -0.0036 |
| PdA19-1B |        |         |      |     |    |     | 3   | 14 | 0.9933 | 0.9982 | 1.0085 | 0.0021  | -0.0012 | -0.0016 |
| PdA19-2A |        |         |      |     |    |     | 359 | 17 | 1.0008 | 0.9997 | 0.9995 | -0.0022 | -0.0025 | -0.0011 |
| PdA19-2B |        |         |      |     |    |     | 359 | 17 | 0.9965 | 0.9955 | 1.008  | 0.0021  | -0.003  | -0.0006 |
| PdA19-3A |        |         |      |     |    |     | 0   | 32 | 0.9953 | 0.998  | 1.0067 | -0.0001 | -0.0024 | 0.0009  |
| PdA19-3B |        |         |      |     |    |     | 0   | 32 | 0.9958 | 0.9996 | 1.0045 | 0.0004  | -0.0041 | -0.0009 |
| PdA19-4A |        |         |      |     |    |     | 356 | 43 | 0.9995 | 0.9962 | 1.0043 | -0.0027 | 0.0009  | 0.0045  |
| PdA19-4B |        |         |      |     |    |     | 356 | 43 | 1.0009 | 1.0013 | 0.9978 | -0.0002 | 0.0011  | 0.0002  |
| PdA19-5A |        |         |      |     |    |     | 4   | 32 | 1.0006 | 0.9999 | 0.9996 | 0.0001  | -0.0034 | 0.0007  |
| PdA19-5B |        |         |      |     |    |     | 4   | 32 | 0.9962 | 0.9996 | 1.0043 | -0.0008 | -0.0024 | 0.0014  |
| PdA19-6A |        |         |      |     |    |     | 1   | 38 | 0.9955 | 0.9984 | 1.0061 | -0.0005 | -0.0041 | -0.0006 |
| PdA19-6B |        |         |      |     |    |     | 1   | 38 | 0.9944 | 0.9972 | 1.0083 | 0.002   | -0.0001 | 0.0012  |
| PdA20-1A | 715013 | 4688447 | 1021 | 294 | 25 | 24  | 73  | 52 | 0.9937 | 1.0096 | 0.9967 | 0.0032  | -0.0045 | -0.0081 |
| PdA20-1B |        |         |      |     |    |     | 73  | 52 | 0.994  | 1.01   | 0.996  | 0.0023  | -0.0037 | -0.0073 |
| PdA20    |        |         |      |     |    |     |     |    |        |        |        |         |         |         |
