# Supplementary material
Source: publisher figshare collection journal article supplement (https://geolsoc.figshare.com/articles/dataset/_/3453998)
Supplement: Supplementary file 3 [file 1]

AMS data after Pueyo et al.,1997

| Site | Location  |          | Bedding |     |    | K                | Kmax       |        |                |        | Kmin       |        |                |        | Jelenek Parameters |       |
|------|-----------|----------|---------|-----|----|------------------|------------|--------|----------------|--------|------------|--------|----------------|--------|--------------------|-------|
|      | ED50-30T  |          | Strike  | Dip | DD | 10-6SI<br>Bulk K | Geographic |        | Tilt Corrected |        | Geographic |        | Tilt-Corrected |        | T                  | P'    |
|      | UTM-North | UTM-East |         |     |    |                  | K1-dec     | K1-inc | K1-dec         | K1-inc | K1-dec     | K1-inc | K1-dec         | K1-inc |                    |       |
| AR12 | 4687505   | 712257   | 202     | 60  | W  | 132.5            | 351        | 24     | 180            | 12     | 97         | 31     | 29             | 77     | 0.325              | 1.056 |
| AR13 | 4687431   | 711848   | 227     | 37  | N  | 141.2            | 345        | 18     | 171            | 15     | 110        | 61     | 14             | 73     | 0.144              | 1.030 |
| AR15 | 4687276   | 716364   | 260     | 31  | N  | 133.0            | 5          | 21     | 186            | 9      | 172        | 70     | 348            | 79     | lost               | 1.020 |
| AR16 | 4688268   | 716166   | 280     | 32  | N  | 153.5            | 0          | 31     | 180            | 1      | 206        | 55     | 267            | 81     | -0.010             | 1.011 |
| AR17 | 4689501   | 713595   | 282     | 35  | N  | 163.6            | 78         | 18     | 71             | 2      | 199        | 50     | 234            | 83     | 0.548              | 1.038 |
| PAE1 | 4687617   | 715701   | 264     | 23  | N  | 140.1            | 352        | 12     | 173            | 11     | 124        | 75     | 36             | 73     | -0.218             | 1.012 |
| PAE3 | 4689376   | 714158   | 314     | 46  | E  | 207.0            | 325        | 1      | 134            | 7      | 234        | 50     | 351            | 81     | 0.398              | 1.025 |
| PAE4 | 4689456   | 714313   | 308     | 38  | N  | 137.1            | 25         | 44     | 23             | 7      | 234        | 51     | 303            | 80     | -0.238             | 1.009 |
| PAO1 | 4687096   | 712282   | 218     | 32  | W  | 160.1            | 341        | 26     | 164            | 2      | 124        | 59     | 17             | 88     | 0.192              | 1.044 |
| PAO2 | 4689186   | 712703   | 211     | 32  | W  | 167.7            | 238        | 5      | 64             | 10     | 141        | 51     | 195            | 77     | 0.419              | 1.030 |
| PAO3 | 4688480   | 711254   | 212     | 39  | W  | 146.5            | 227        | 8      | 57             | 3      | 122        | 58     | 311            | 83     | 0.005              | 1.022 |
| PAO4 | 4689142   | 712296   | 248     | 26  | N  | 221.5            | 357        | 14     | 179            | 11     | 126        | 68     | 39             | 77     | -0.249             | 1.017 |
